# Supplementary material for: Patterns of the Nutrients and Metabolites in Apostichopus japonicus Fermented by Bacillus natto and Their Ability to Alleviate Acute Alcohol Intoxication
Source: MDPI journal article supplement (doi:10.3390/foods13020262), 2024-01-14
Supplement: s1 [file s1]

Table S1. Amino acid differential metabolites of FSC and SC (negative ionization mode)

| Metabolic pathway                                    | Up-regulated differential metabolites                              | Down-regulated differential metabolites               |
|------------------------------------------------------|--------------------------------------------------------------------|-------------------------------------------------------|
| tyrosine metabolism (Tyr)                            | Tyrosine, norepinephrine, epinephrine, tyramine, 3-methoxytyramine | 3,5-Diiodo-L-tyrosine, 3-Iodo-L-tyrosine, Gallic acid |
| Metabolism of alanine, aspartate and glutamate       | L-Arginine succinate                                               | $\alpha$ -Ketoglutaric acid                           |
| tryptophan metabolism (Trp), an essential amino acid | Melatonin, indole                                                  | Indole 3acetamide; Kynurenine; D-Kynurenine           |
| Glycine, serine and threonine metabolism             | L-Threonine, Cystathionine                                         | betaine                                               |
| Cysteine and methionine metabolism                   | Methionine, cystathionine                                          | glutathione                                           |

Table S2. Amino acid differential metabolites of FSC and SC (negative ionization mode)

| metabolic pathway                           | Up-regulated differential metabolites                                                                          | Down-regulated differential metabolites |
|---------------------------------------------|----------------------------------------------------------------------------------------------------------------|-----------------------------------------|
| tyrosine metabolism (Tyr)                   | Indole-5,6-quinone, 3,4-dihydroxy-L-phenylalanine, 4-hydroxyphenethyl alcohol, homovanillic acid, hydroquinone | fumaric acid                            |
| Histidine metabolism                        | L-Aspartic acid, imidazoleacetic acid                                                                          | L-glutamic acid, 1-methylhistamine      |
| Phenylalanine metabolism                    | N-acetyl-L-phenylalanine, D-phenylalanine, phenylpyruvic acid, trans-cinnamic acid                             | fumaric acid                            |
| Arginine and proline metabolism             | Ethyl 5-aminopentanoate, 4-oxo-L-proline                                                                       | L-Glutamic acid                         |
| Valine, leucine and isoleucine biosynthesis | 2-Isopropylmalic acid                                                                                          | -                                       |
| Lysine biosynthesis                         | L-Saccharin                                                                                                    | L-Aspartic acid                         |

-: not detected.
